# Supplementary material for: Atypical Chronic Myeloid Leukemia: Where Are We Now?
Source: Int J Mol Sci. 2020 Sep 18;21(18):6862. doi: 10.3390/ijms21186862 (PMC7555965; doi:10.3390/ijms21186862)
Supplement: Supplementary file 1 [file ijms-21-06862-s001.xlsx]

## Sheet: Sheet1
Gene ID	Transcript ID	Exon Targets Screened
ABL1	NM_007313.2	4-6
ASXL1	NM_015338.5	12
ATRX	NM_000489.4	8-10, 17-31
BCOR	NM_001123385.1	All
BCORL1	NM_001184772.2	All
BRAF	NM_004333.4	15
CALR	NM_004343.3	9
CBL	NM_005188.3	8, 9
CBLB	NM_170662.4	9, 10
CBLC	NM_012116.3	9, 10
CDKN2A	NM_000077.4	All
CEBPA	NM_004364.4	All
CSF3R	NM_156039.3	14-17
CUX1	NM_181552.3	All
DNMT3A	NM_175629.2	All
ETV6/TEL	NM_001987.4	All
EZH2	NM_004456.4	All
FBXW7	NM_018315.4	9-11
FLT3	NM_004119.2	14, 15, 20
GATA1	NM_002049.3	2
GATA2	NM_032638.4	2-6
GNAS	NM_080425.3	8, 9
HRAS	NM_005343.3	2, 3
IDH1	NM_005896.3	4
IDH2	NM_002168.3	4
IKZF1	NM_006060.5	All
JAK2	NM_004972.3	12, 14
JAK3	NM_000215.3	13
KDM6A	NM_001291415.1	All
KIT	NM_000222.2	2, 8-11, 13, 17
KRAS	NM_033360.3	2, 3
MLL	NM_001197104.1	5-8
MPL	NM_005373.2	10
MYD88	NM_001172567.1	3-5
NOTCH1	NM_017617.4	26-18, 34
NPM1	NM_002520.6	12
NRAS	NM_002524.3	2, 3
PDGFRA	NM_006206.5	12, 14, 18
PHF6	NM_001015877.1	All
PTEN	NM_000314.6	5, 7
PTPN11	NM_002834.3	3, 13
RAD21	NM_006265.2	All
RUNX1	NM_001754.4	All
SETBP1	NM_015559.2	4 (partial)
SF3B1	NM_012433.3	13-16
SMC1A	NM_006306.3	2, 11, 16, 17
SMC3	NM_005445.3	10, 13, 19, 23, 25, 28
SRSF2	NM_003016.4	1
STAG2	NM_001042749.2	All
TET2	NM_001127208.2	3-11
TP53	NM_000546.5	2-11
U2AF1	NM_006758.2	2, 6
WT1	NM_024426.4	7, 9
ZRSR2	NM_005089.3	All
